# Supplementary material for: Non-Invasive Monitoring of Increased Fibrotic Tissue and Hyaluronan Deposition in the Tumor Microenvironment in the Advanced Stages of Pancreatic Ductal Adenocarcinoma
Source: MDPI journal article supplement (doi:10.3390/cancers14040999), 2022-02-16
Supplement: s1 [file s1]

# Supplementary Materials: Non-Invasive Monitoring of Increased Fibrotic Tissue and Hyaluronan Deposition in the Tumor Microenvironment in the Advanced Stages of Pancreatic Ductal Adenocarcinoma

Ravneet Vohra, Yak-Nam Wang, Helena Son, Stephanie Totten, Akshit Arora, Adam Maxwell and Donghoon Lee

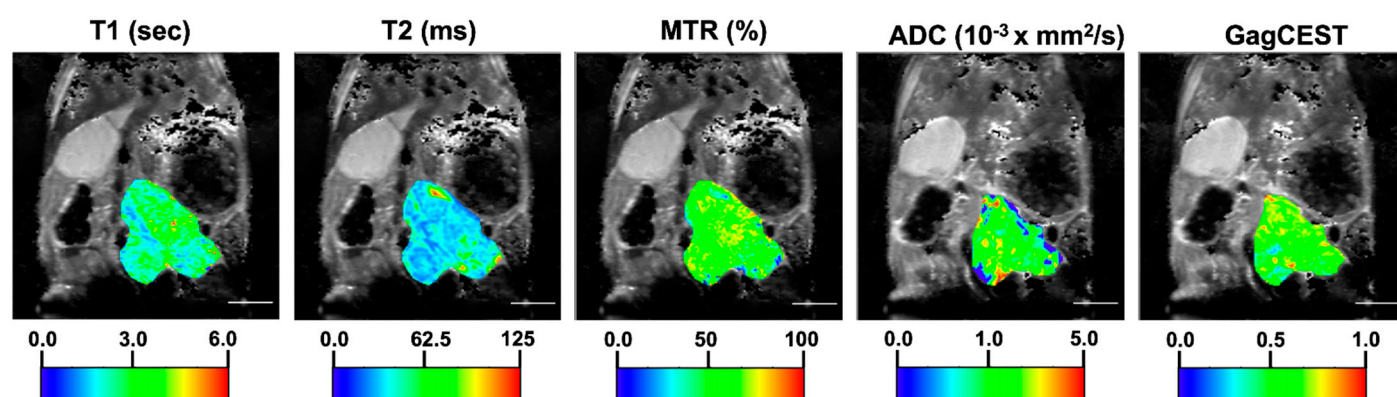

**Figure S1.** Representative colored maps with T1, T2, MTR, ADC and GagCEST measures of pancreatic tumor from a KPC mouse. Scale bar = 5 mm.

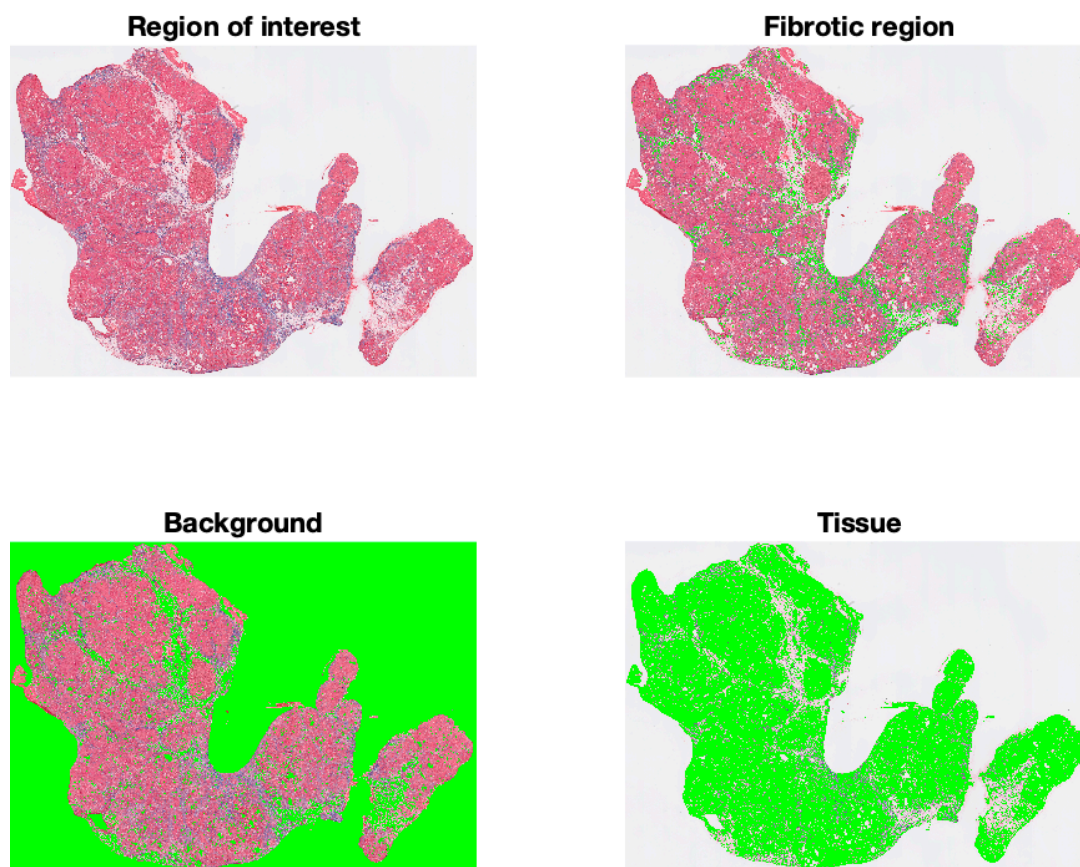

**Figure S2.** Representative image of methodology demonstrating the technique used to quantify connective tissue deposition in the region of interest in the pancreatic tumor of KPC mouse.
